# Supplementary material for: VCE-003.2, a novel cannabigerol derivative, enhances neuronal progenitor cell survival and alleviates symptomatology in murine models of Huntington’s disease
Source: PubMed Central journal article supplement (PMC4949444; doi:10.1038/srep29789), 2016-07-19
Supplement: srep29789-s1.pdf [file srep29789-s1.pdf]

## Supplemental information

**Title:** VCE-003.2, a novel cannabigerol derivative, enhances neuronal progenitor cell survival and alleviates symptomatology in murine models of Huntington's disease.

**Authors:** Javier Diaz-Alonso<sup>1-3#</sup>, Juan Paraíso Luna<sup>1-3#</sup>, Carmen Navarrete<sup>4#</sup>, Carmen del Rio<sup>5</sup>, Irene Cantarero<sup>5</sup>, Belen Palomares<sup>5</sup>, José Aguarales<sup>1-3</sup>, Javier Fernandez-Ruiz<sup>1,3,6</sup>, María Luz Bellido<sup>4</sup>, Federica Pollastro<sup>7</sup>, Giovanni Appendino<sup>7</sup>, Marco A. Calzado<sup>5</sup>, Ismael Galve-Roperh<sup>1-3\*</sup>, Eduardo Muñoz<sup>5\*</sup>

<sup>1</sup>Instituto Ramón y Cajal de Investigación Sanitaria (IRYCIS), Ctra. Colmenar Viejo, km. 9100, Madrid, Spain. <sup>2</sup>Departamento de Bioquímica y Biología Molecular I. Universidad Complutense, Madrid, Spain. <sup>3</sup>Centro de Investigación Biomédica en Red sobre Enfermedades Neurodegenerativas (CIBERNED), Madrid, Spain. <sup>4</sup>VivaCell Biotechnology España, Córdoba, Spain. <sup>5</sup>Instituto Maimónides de Investigación Biomédica de Córdoba, Hospital Universitario Reina Sofía, Departamento de Biología Celular, Fisiología e Inmunología. Universidad de Córdoba, Spain. <sup>6</sup>Instituto Universitario de Investigación en Neuroquímica. Departamento de Bioquímica y Biología Molecular III, Universidad Complutense, Madrid, Spain. <sup>7</sup>Dipartimento di Scienze Farmaceutiche, Università del Piemonte Orientale, Novara, Italy.

<sup>#</sup>Equal contributing authors.

<sup>\*</sup>Co-corresponding Authors: Ismael Galve-Roperh, PhD. Departamento de Bioquímica y Biología Molecular I. Universidad Complutense-CIBERNED, Madrid, Spain, Phone: +34 913944668; e-mail: [igr@quim.ucm.es](mailto:igr@quim.ucm.es). Eduardo Muñoz MD, PhD. Instituto Maimónides de Investigación Biomédica de Córdoba, Avda. Menéndez Pidal s/n. 14004. Córdoba, Spain. Phone: +34 957213766; e-mail: [e.munoz@uco.es](mailto:e.munoz@uco.es)

**VCE-003 synthesis.** tBuOK (2.00 g, 17.824 mmol) was added to a solution of Cannabigerol (CBG) (2.00 g, 6.319 mmol) in toluene (400 mL), to give a purple-colored solution. The reaction mixture was stirred at r.t., in an air-opened round bottom flask, and conversion was monitored by TLC analysis (eluent: 10% EtOAc/hexanes). After 2 h, the reaction mixture was washed with HCl (5% aqueous solution, 300 mL) and the aqueous layer was extracted with EtOAc (100 mL). Combined organic layers were dried over Na<sub>2</sub>SO<sub>4</sub> (anhydrous), filtered and concentrated. The crude residue was flash chromatographed on SiO<sub>2</sub> (2 to 4% EtOAc/hexanes), to give 1.10 g of VCE-003 [orange-colored solid, yield: 53%].

**<sup>1</sup>H NMR** (CDCl<sub>3</sub>, 300 MHz): δ 6.94 (s, -OH, 1H), 6.45 (s, 1H), 5.13 (br t, *J* = 6.8 Hz, 1H), 5.04 (br t, *J* = 6.8 Hz, 1H), 3.14 (s, *J* = 6.8 Hz, 2H), 2.41 (t, *J* = 7.8 Hz, 2H), 2.09-1.92 (m, 4H), 1.73 (br s, 3H), 1.57 (br s, 3H), ca. 1.52 (m, 2H), 1.38-1.17 (m, 4H), 0.89 (t, *J* = 7.8 Hz, 3H).

**VCE-003.2 synthesis.** Ethylamine (5.2 mL, 70% solution in H<sub>2</sub>O, 65.403 mmol) was added to a solution of VCE-003 (510 mg, 1.543 mmol) in EtOH (50 mL). The reaction mixture was stirred at r.t. for 2 h and was poured into H<sub>2</sub>O (120 mL), taken up to pH= 2 with HCl (10% aqueous solution) and extracted with CH<sub>2</sub>Cl<sub>2</sub> (2x80 mL). The organic layer was dried over Na<sub>2</sub>SO<sub>4</sub> (anhydrous), filtered and concentrated. Crude residue was purified by reverse phase chromatography (30 to 100% CH<sub>3</sub>CN/H<sub>2</sub>O) to give 435 mg of 2-(3,7-dimethyl-octa-2,6-dienyl)-6-ethylamino-3-hydroxy-5-pentyl-[1,4]benzo-quinone [purple-colored solid, yield: 75%].

**<sup>1</sup>H NMR** (CDCl<sub>3</sub>, 300 MHz) δ ppm: 6.39 (bs, 1H), 5.09 (m, 2H), 3.54 (t, *J* = 6.6 Hz, 2H), 3.05 (d, *J* = 6.6 Hz, 2H), 2.49 (m, 2H), 1.99 (m, 4H), 1.72 (s, 3H), 1.64 (s, 3H), 1.57 (s, 3H), 1.44-1.22 (m, 9H), 0.88 (m, 3H).

**Cysteine recovery assay.** 10 mg of VCE-003 and a molar equivalent amount of VCE-003.2 were independently dissolved in 1 mL DMSO, and each solution was next treated with an excess (4 mol. equivalents) of cysteamine. After stirring at room temperature for 1 h, the solutions were diluted with water (2 mL) and extracted with hexane- ether 9:1. After evaporation, the solution was taken up in CDCl<sub>3</sub> and analyzed by <sup>1</sup>H-NMR. While compound VCE-003.2 could be recovered unscathed in an essential quantitative way,

VCE-003 was undetectable in the residue, indicating that it had irreversibly reactive with cysteamine to form polar and not extractable adducts.

**Determination of ROS:** N2a cells were seeded at  $25 \times 10^3$  cells/ml in 96-well plates and incubated with  $0.25 \mu\text{M}$  5-(and-6)-chloromethyl-2',7'-dichlorodihydrofluorescein diacetate acetyl ester (CM-H<sub>2</sub>DCFDA) for 20 minutes at 37°C. Then, the cells were treated with either VCE-003 or VCE-003.2 for 2 hours. Cells exposed to pro-oxidant tert-Butyl hydroperoxide (TBHP) were used as positive control. H<sub>2</sub>DCFDA oxidation was detected using an Incucyte™ Live-Cell Imaging System (Hertfordshire, UK).

**Nrf2 transcriptional assay:** To study Nrf2 transcriptional activity N2a cells were seeded ( $10^5$ /ml) in 24-well plates and transiently transfected with the plasmid NQO1-ARE-Luc using Roti<sup>®</sup>-Fect following the manufacturer's instructions (Carl Roth, Karlsruhe, Germany). After 24 hours, cells were incubated with the compounds at the concentrations indicated during 6 hours and the luciferase activity was determined using an Autolumat LB 953 (EG&G Berthold, Bad Wildbad, Germany). Protein content was determined by the Bradford method to calculate RLU/ $\mu\text{g}$  of protein and the results were expressed as a fold induction over untreated cells.

**Table S1.** Human primer sequences used in quantitative Polymerase Chain Reactions

| Genes          | Forward                       | Reverse                        |
|----------------|-------------------------------|--------------------------------|
| PPAR- $\gamma$ | 5'-gcgattcctcactgatacactg-3'  | 5'-gagtgggagtggtctccattac-3'   |
| LPL            | 5'-ggcgctacctgagatagagtctg-3' | 5'-tgtttctacagggctttagatgac-3' |
| CEBPA          | 5'-ccttgtccttggaatgcaaac-3'   | 5'-ctgctccccctctctca-3'        |
| ADIPOQ         | 5'-catgaccaggaaaccacgactc-3'  | 5'-ccgatgtctccctaggacca-3      |
| FABP-4         | 5'-ccaggaattgacgaagt-3'       | 5'-tctcttatggtggtgatt-3'       |
| Runx2          | 5'-tggtaatctccgaggtcac-3'     | 5'-actgtgctgaagaggctgttg-3'    |
| SP7            | 5'-agccagaagctgtgaaacctc-3'   | 5'-agctgcaagctctccataacc-3'    |
| ALP            | 5'-ccaacgtggctaagaatgcatc-3'  | 5'-tgggcattggtgtgtacgtc-3'     |
| IBSP           | 5'-agggcagtagtactcatccg-3'    | 5'-cgtcctcctcatagcccagtggtg-3' |
| HPRT           | 5'-atgggaggccatcacattgt-3'    | 5'-atgtaatccagcaggtcagca-3'    |



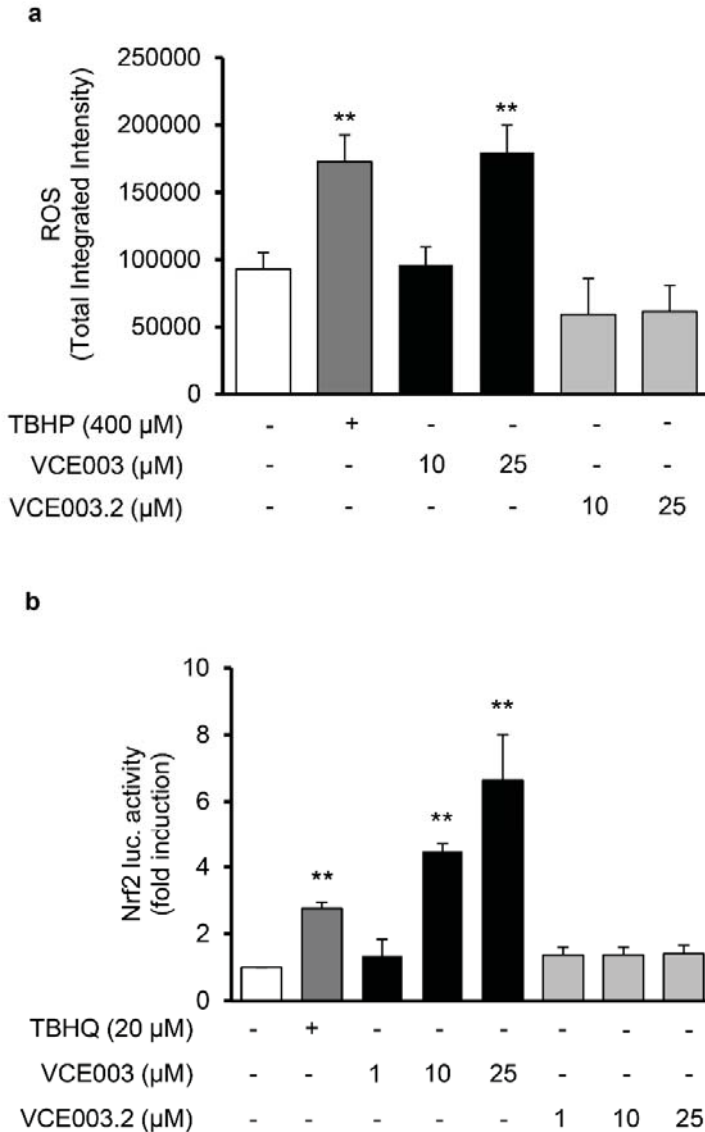

**Supplementary Figure S1. Non-electrophilic activity for VCE-003.2.** (a) Reactive oxygen species production. N2a cells were stained with CM-H2DCFDA and treated with VCE-003 or VCE-003.2 for 2 hours. Then, reactive oxygen species were measured by Incucyte™ Live-Cell Imaging System. Results are expressed as mean of total integrated intensity (ROS positive cells)  $\pm$  S.D. (b) Effect on Nrf2 transcriptional activity. N2a cells were transiently transfected with the NQO1-ARE-Luc plasmid and incubated with the indicated compound concentrations for 6 hours prior to luciferase activity determination. Results are expressed as the fold induction  $\pm$  S.D. relative to untreated control. All the results are representative of at least three independent experiments. Statistics: \*\* $p < 0.01$  VCE-003 treatment versus Vehicle treated cells.

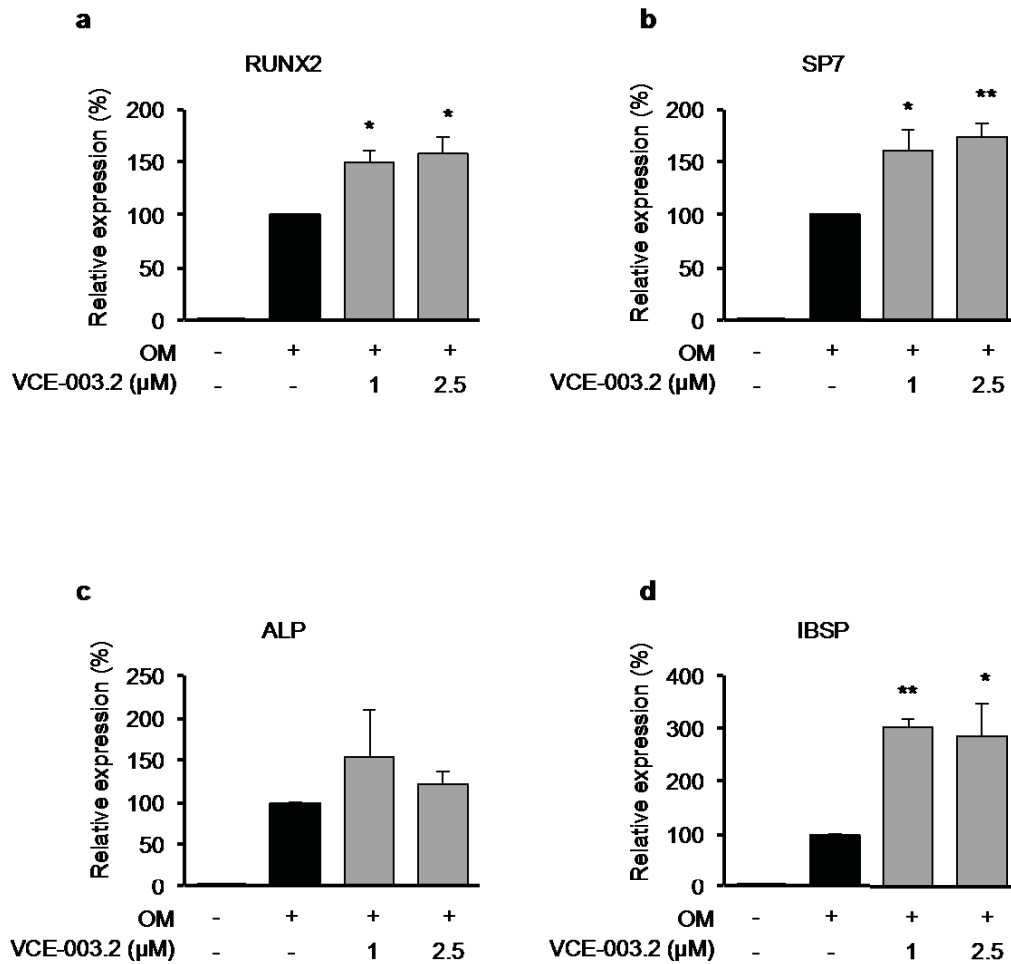

**Supplementary Figure S2. Effect of VCE-003.2 on osteoblast-differentiating MSCs.** The influence of VCE-003.2 in osteoblastogenesis was evaluated by the changes in the expression of the indicated genes involved in osteoblast formation at 14 days of differentiation. VCE-003.2 caused a mild induction of these genes. Statistics: \*  $p < 0.05$  and \*\*  $p < 0.01$  VCE-003.2 treatment vs osteoblast medium (OM).

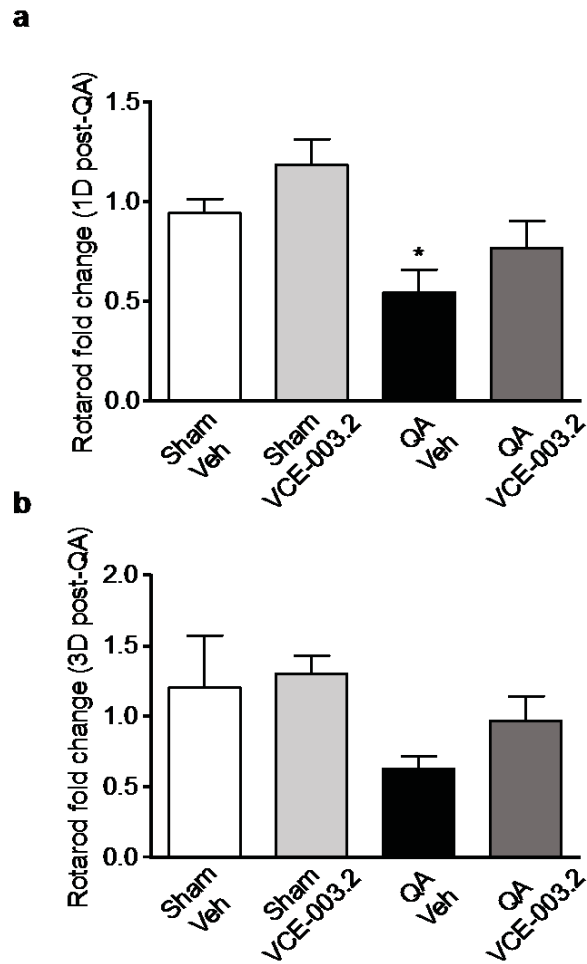

**Supplementary Figure S3. Effect of VCE-003.2 administration in QA-induced excitotoxicity *in vivo*.** Rotarod performance (fold change) was determined 1 and 3 days after lesion in QA-injected mice treated with vehicle or VCE-003.2. Values are expressed as means  $\pm$  SEM. Sham-Veh and Sham-VCE (n=7, each group); QA-Veh (n=8); QA-VCE (n=7). Statistics: \* p<0.05 versus Sham-Vehicle treated mice.
